# Supplementary material for: Kinesin-2 mediates apical endosome transport during epithelial lumen formation
Source: PubMed Central journal article supplement — Cell Logist. 2014 May 6;4:e28928. doi: 10.4161/cl.28928 (PMC4024058; doi:10.4161/cl.28928), 2014-05-06

## **Supplemental Material to:**

**Dongying Li, E Wolfgang Kuehn and Rytis Prekeris**

**Kinesin-2 mediates apical endosome transport during  
epithelial lumen formation**

**Cellular Logistics 2014; 4(1)**

**<http://dx.doi.org/10.4161/cl.28928>**

**[http://www.landesbioscience.com/journals/cellularlogistics/  
article/28928/](http://www.landesbioscience.com/journals/cellularlogistics/article/28928/)**

**Figure S1.** Mapping FIP5-binding domain. GST pull-down assays show that FIP5 binds to GST- Kif3B(524-747), GST- Kif3B(593-747), and GST- Kif3B(621-747). The schematic representation of this binding data is shown in **Figure 1B**.

**Figure S2.** Kif3A knock-down does not affect overall distribution of microtubules and Trans-Golgi Network (TGN). MDCK-shKif3A#1 cells were grown in Matrigel for 24 hours in the presence or absence of doxycycline. Cells were then fixed and immunostained for  $\alpha$ -tubulin and VAMP4 (TGN marker). Images in (A) and (D) show cells in interphase. Images in (B) show cells in metaphase. Images in (C) show cells in late anaphase.

# Figure S1

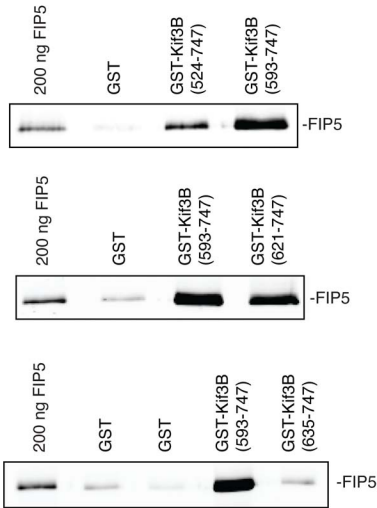

Figure S2

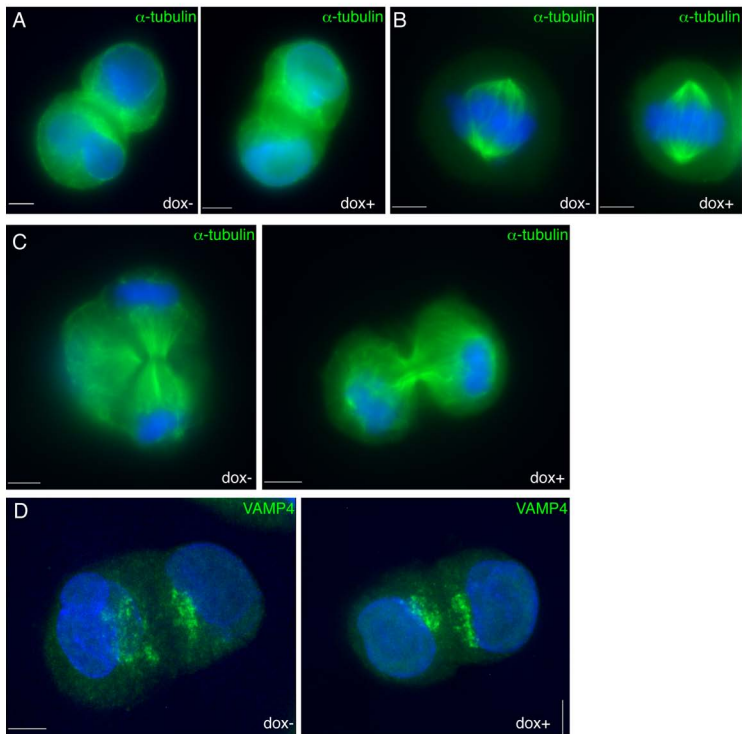

Supplement: cl-4-e28928-s01.pdf [file cl-4-e28928-s01.pdf]
